# Supplementary material
Source: PubMed Central journal article supplement (PMC7487048)
Supplement: NIHMS1609486-supplement-1.pdf [file NIHMS1609486-supplement-1.pdf]

## Supplemental Appendix

## Supplemental Tables

**Table S1:** Published findings of association between menopausal hormone therapy use and ovarian cancer survival (Online only).

| Author, Year                     | HR (95% CI) overall survival for any HT use                          | Type | Study design                                | N, population       | Notes                                                                |
|----------------------------------|----------------------------------------------------------------------|------|---------------------------------------------|---------------------|----------------------------------------------------------------------|
| Pre-diagnosis                    |                                                                      |      |                                             |                     |                                                                      |
| Mascarenhas, 2006 <sup>[5]</sup> | 0.83 (0.65, 1.08)                                                    | Any  | Cohort, follow-up on population-based cases | 649, Sweden         | Examination of different HRT preparations did not give different HRs |
| Wernli, 2008 <sup>[6]</sup>      | 1.1 (0.85, 1.43)                                                     | Any  | Case-control, population based              | 751, United States  |                                                                      |
| Nagle, 2008 <sup>[7]</sup>       | 0.83 (0.64, 1.08)                                                    | Any  | Cohort, population-based                    | 676, Australia      |                                                                      |
| Zhang, 2012 <sup>[8]</sup>       | 0.23 (0.03, 1.73)                                                    | Any  | Cohort                                      | 195, China          |                                                                      |
| Hein, 2013 <sup>[9]</sup>        | 75% (65, 86) 5-yr survival for HRT users; 43% (36, 52) for non-users | Any  | Cohort                                      | 244, Bavaria        | Women who had used HRT: younger, lower stage, more optimal debulking |
| Shafir, 2016 <sup>[10]</sup>     | 0.70 (0.55, 0.9)                                                     | Any  | Cohort                                      | 1649, United States |                                                                      |
| Kim, 2017 <sup>[11]</sup>        | 0.79 (0.62, 1.01)                                                    | Any  | Cohort, registry-based                      | 1421, Canada        |                                                                      |
| Besevic, 2015 <sup>[12]</sup>    | 0.80 (0.55, 1.16)                                                    | EPT  | Cohort                                      | 1025, Europe        |                                                                      |
|                                  | 0.86 (0.54, 1.35)                                                    | ET   |                                             |                     |                                                                      |
| Felix, 2015 <sup>[13]</sup>      | 0.97 (0.68, 1.38)                                                    | EPT  | Cohort, population-based                    | 396, United States  | Noted interaction between HRT type and histology                     |
|                                  | 1.09 (0.7, 1.68)                                                     | ET   |                                             |                     |                                                                      |
| Post-diagnosis                   |                                                                      |      |                                             |                     |                                                                      |
| Eeles, 1991 <sup>[14]</sup>      | 0.73 (0.44, 1.2)                                                     | Any  | Cohort, retrospective                       | 373, United Kingdom | No difference in disease-free interval                               |
| Ursic-Vrscaj,                    | 0.67 (0.27, 1.62) (relapse)                                          | Any  | Case-control                                | 72, Slovenia        |                                                                      |

|                                  |                                |     |                                             |                                         |                                                                      |
|----------------------------------|--------------------------------|-----|---------------------------------------------|-----------------------------------------|----------------------------------------------------------------------|
| 2001 <sup>[15]</sup>             | 0.90 (0.24, 5.08) (survival)   | Any |                                             |                                         |                                                                      |
| Mascarenhas, 2006 <sup>[5]</sup> | 0.57 (0.42, 0.78)              | Any | Cohort, follow-up on population-based cases | 649, Sweden                             | Examination of different HRT preparations did not give different HRs |
| Wen, 2013 <sup>[16]</sup>        | 0.82 (0.48, 1.4) (relapse)     | Any | Cohort, retrospective                       | 144, China                              |                                                                      |
|                                  | 0.67 (0.18, 2.5) (survival)    | Any |                                             |                                         |                                                                      |
| Eeles, 2015 <sup>[17]</sup>      | 0.63 (0.44, 0.90)              | Any | RCT                                         | 150, United Kingdom, Spain, and Hungary | Greater relapse-free survival, HR=0.67 (0.47, 0.97)                  |
| Power, 2016 <sup>[18]</sup>      | 0.50 (0.23, 1.09) (<55yrs old) | Any | Cohort, retrospective                       | 357, Manitoba, Canada                   |                                                                      |
|                                  | 0.85 (0.43, 1.68) (≥55yrs old) | Any |                                             |                                         |                                                                      |
| Li, 2012 <sup>[19]</sup>         | 0.88 (0.35, 2.32)              | EPT | Cohort, prospective                         | 75, China                               |                                                                      |
| Guidozzi, 1999 <sup>[20]</sup>   | 0.97 (0.65, 1.18) (relapse)    | ET  | RCT                                         | 125, South Africa                       | Non-significantly better overall survival as well                    |

**Table S2:** Ovarian Cancer Association Consortium (OCAC) study sites with women included in the analysis (Online only).

| Site code | N (%)       | Full study name                               | Country        | Study design     | Data collection                  | Diagnosis years | Residual Disease information |
|-----------|-------------|-----------------------------------------------|----------------|------------------|----------------------------------|-----------------|------------------------------|
| AUS       | 558 (8.7)   | Australian Ovarian Cancer Study               | Australia      | Population-based | Self-completed questionnaire     | 2002-2006       | Yes                          |
| CON       | 241 (3.8)   | Connecticut Ovary Study                       | United States  | Population-based | In-person interview              | 2002-2009       | No                           |
| DOV       | 569 (8.9)   | Diseases of the Ovary and their Evaluation    | United States  | Population-based | In-person interview              | 2002-2009       | No                           |
| GER       | 97 (1.5)    | Germany Ovarian Cancer Study                  | Germany        | Population-based | Self-completed questionnaire     | 1992-1998       | No                           |
| HAW       | 265 (4.1)   | Hawaii Ovarian Cancer Study                   | United States  | Population-based | In-person interview              | 1994-2007       | Yes                          |
| HOP       | 407 (6.3)   | Hormones and Ovarian Cancer Prediction        | United States  | Population-based | In-person interview              | 2003-2008       | Yes                          |
| MAL       | 377 (5.9)   | Danish Malignant Ovarian Tumor Study          | Denmark        | Population-based | In-person or telephone interview | 1994-1999       | No                           |
| MAY       | 638 (9.9)   | Mayo Clinic Ovarian Cancer Case Control Study | United States  | Clinic-based     | In-person interview              | 1999-2008       | Yes                          |
| NEC       | 879 (13.7)  | New England Case-Control Study                | United States  | Population-based | In-person interview              | 1992-2008       | Yes                          |
| NJO       | 118 (1.8)   | New Jersey Ovarian Cancer Study               | United States  | Population-based | Telephone interview              | 2004-2008       | No                           |
| OPL       | 478 (7.4)   | Ovarian Cancer Prognosis and Lifestyle Study  | Australia      | Population-based | Self-completed questionnaire     | 2012-2015       | Yes                          |
| POL       | 109 (1.7)   | Polish Ovarian Cancer Case-Control Study      | Poland         | Population-based | In-person interview              | 2001-2003       | No                           |
| UCI       | 221 (3.4)   | UC Irvine Ovarian Cancer Study                | United States  | Population-based | Self-completed questionnaire     | 1995-2005       | No                           |
| UKO       | 352 (5.5)   | UK Ovarian Cancer Population Study            | United Kingdom | Population-based | Self-completed questionnaire     | 2006-2007       | No                           |
| USC       | 1110 (17.3) | Study of Lifestyle and Women's Health         | United States  | Population-based | In-person interview              | 1993-2005       | No                           |

**Table S3a:** Hazards ratios, by histotype, for menopausal hormone therapy (MHT) use before diagnosis of ovarian cancer among women with invasive epithelial ovarian cancer in the Ovarian Cancer Association Consortium (OCAC) (Online only).

|            | Overall                  | High-grade serous | Mucinous          | Endometrioid      | Clear cell        | Low-grade serous  |
|------------|--------------------------|-------------------|-------------------|-------------------|-------------------|-------------------|
| N          | 6,419                    | 4,393             | 373               | 925               | 483               | 245               |
| MHT use    | HR (95% CI) <sup>a</sup> |                   |                   |                   |                   |                   |
| None (ref) | 1.0                      | 1.0               | 1.0               | 1.0               | 1.0               | 1.0               |
| <5 years   | 0.97 (0.88, 1.06)        | 0.94 (0.85, 1.04) | 1.77 (1.04, 3.02) | 0.99 (0.71, 1.37) | 0.97 (0.62, 1.51) | 0.98 (0.58, 1.66) |
| 5+ years   | 0.80 (0.74, 0.87)        | 0.78 (0.71, 0.86) | 0.66 (0.34, 1.26) | 1.08 (0.81, 1.43) | 0.83 (0.47, 1.48) | 0.76 (0.47, 1.23) |

<sup>a</sup> Hazard ratios (HRs) are adjusted for age at diagnosis and race/ethnicity, and stratified by histotype (overall analysis only), stage at diagnosis, and OCAC site.

**Table S3b:** Hazard ratios (95% CIs) for MHT use and overall survival, for high-grade serous histology by stage of disease at diagnosis (Online only).

| <b>High-grade serous</b>                   |                    |
|--------------------------------------------|--------------------|
| HR (95% CI)                                |                    |
| MHT use <sup>a</sup>                       |                    |
| <b>Stage I (local)</b>                     | N=205              |
| <5 years                                   | 0.69 (0.32, 1.46)  |
| 5+ years                                   | 0.62 (0.28, 1.35)  |
| <b>Stage II (regional)</b>                 | N=469              |
| <5 years                                   | 0.83 (0.54, 1.30)  |
| 5+ years                                   | 0.72 (0.48, 1.08)  |
| <b>Stage III and IV (advanced/distant)</b> | N=3719             |
| <5 years                                   | 0.96 (0.86, 1.06)  |
| 5+ years                                   | 0.79 (0.71, 0.86)* |

<sup>a</sup> Reference category of no use for all analyses.

<sup>b</sup> Hazard ratios (HRs) are adjusted for age at diagnosis and race/ethnicity, and stratified by OCAC site.

\* Significant at a level of  $p < 0.001$ .

**Table S4:** HR for MHT use and progression-free survival of ovarian cancer (Online only).

| Progression-free survival |                          |
|---------------------------|--------------------------|
| N <sup>a</sup>            | 2,150                    |
| MHT use                   | HR (95% CI) <sup>b</sup> |
| None (ref)                | 1.0                      |
| <5 years                  | 0.94 (0.81, 1.09)        |
| 5+ years                  | 0.94 (0.82, 1.09)        |

<sup>a</sup> Data on presence of progression and time to progression was only available for a subset of the women.

<sup>b</sup> Hazard ratios (HRs) were adjusted for age at diagnosis and race/ethnicity, and stratified by histotype, stage at diagnosis, and OCAC site.

**Table S5:** Hazards ratios for MHT use and overall survival in a fully adjusted model (Online only).

| Among women with complete information for all variables, N=4,044 |                   |                                      |                                                  |                                   |
|------------------------------------------------------------------|-------------------|--------------------------------------|--------------------------------------------------|-----------------------------------|
| Variable included                                                | Unadjusted        | Age and stage <sup>1</sup>           | Primary model                                    | Fully adjusted <sup>2</sup> model |
| MHT use                                                          | --                | Age at diagnosis, stage at diagnosis | Age, stage, race/ethnicity, histotype, OCAC site | HR (95% CI) <sup>a</sup>          |
| None (ref)                                                       | 1.0               | 1.0                                  | 1.0                                              | 1.0                               |
| <5 years                                                         | 0.96 (0.87, 1.07) | 0.96 (0.86, 1.06)                    | 0.96 (0.87, 1.07)                                | 0.96 (0.87, 1.07)                 |
| 5+ years                                                         | 0.98 (0.89, 1.08) | 0.80 (0.73, 0.88)                    | 0.79 (0.71, 0.87)                                | 0.79 (0.71, 0.88)                 |

<sup>1</sup> Change in HR estimates was primarily driven by accounting for stage, though age confounded the relationship as well.

<sup>2</sup> Stratified by stage at diagnosis, OCAC site, histotype, and adjusted for age at diagnosis, race/ethnicity, BMI, education level, tubal ligation, endometriosis, hysterectomy, combined oral contraceptive use duration (never, <1 year, 1 to <5 years, 5 to <10 years, 10+ years), parity, family history of breast cancer, family history of ovarian cancer, smoking status (never, former, current).

**Table S6:** Hazard ratios (HRs) for MHT use and overall survival, among advanced stage, high-grade serous carcinoma, stratified by macroscopic residual disease (Online only).

| <b>MHT use</b>     | <b>HR (95% CI)</b>        |                              |
|--------------------|---------------------------|------------------------------|
|                    | Residual disease<br>N=891 | No residual disease<br>N=497 |
| <b>None (ref)</b>  | 1.0                       | 1.0                          |
| <b>&lt;5 years</b> | 1.08 (0.86, 1.35)         | 1.07 (0.74, 1.53)            |
| <b>5+ years</b>    | 0.89 (0.68, 1.17)         | 0.81 (0.54, 1.22)            |

## Supplemental Figures

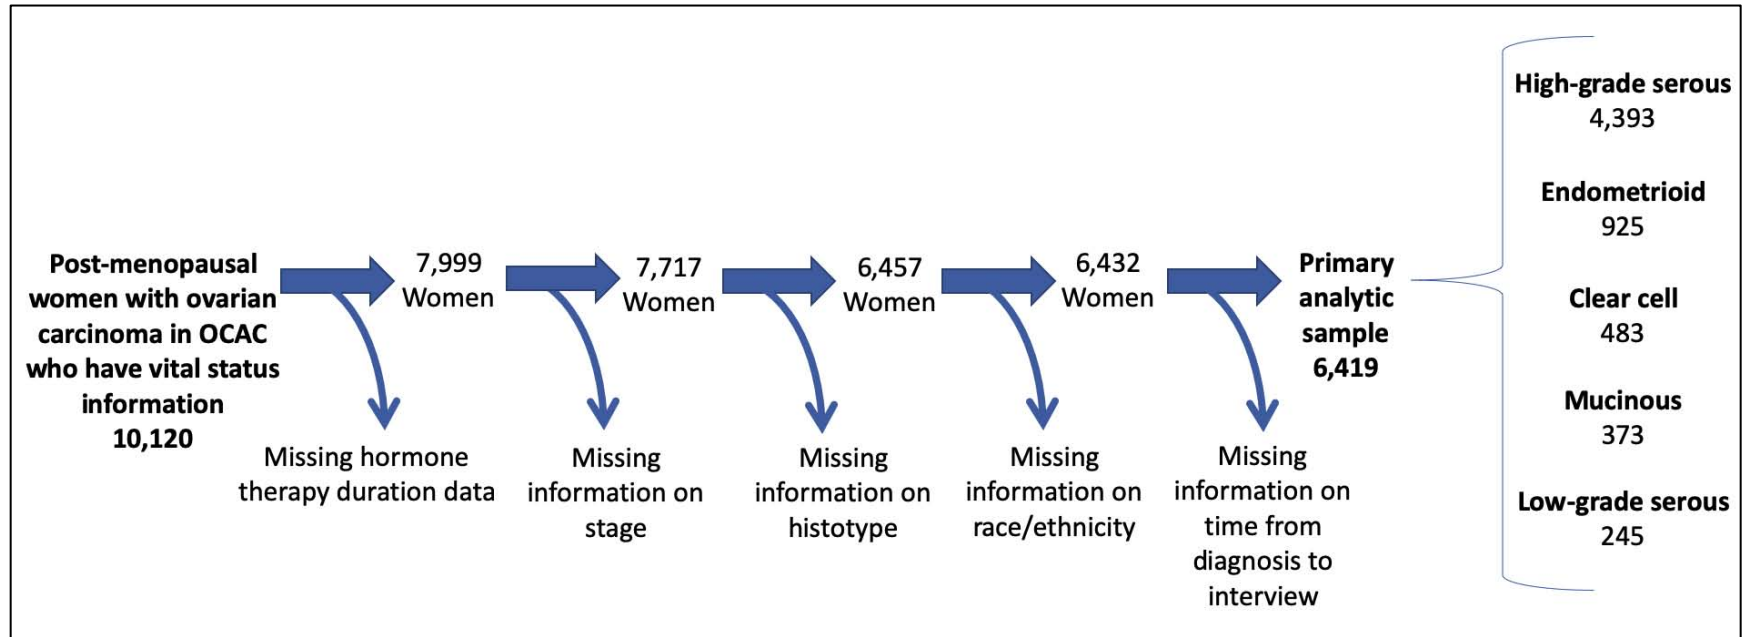

**Figure S1: Study participants.** All women were from the Ovarian Cancer Association Consortium (OCAC). The population-based and clinic-based studies included were done in the United States (n=9), Europe (n=4), and Australia (n=2). Only post-menopausal women with ovarian carcinoma for whom survival time data was available were considered for this analysis. The exclusion stage “missing histotype” included exclude of those with mixed cell and undifferentiated tumors. Of the five histotypes high-grade serous was the most common (68% of cases) among these women, followed by endometrioid (14%), clear cell (7.5%), mucinous (5.8%), and low-grade serous (3.8%). Of the 6,419 women in our analytic sample, subsets with complete information were analyzed for progression-free survival (n=2,239) and for the association between hormone therapy and residual disease (n=2,056). Time of interview refers to time of study enrollment; for some studies this was an in-person interview and for some it was a self-administered questionnaire.



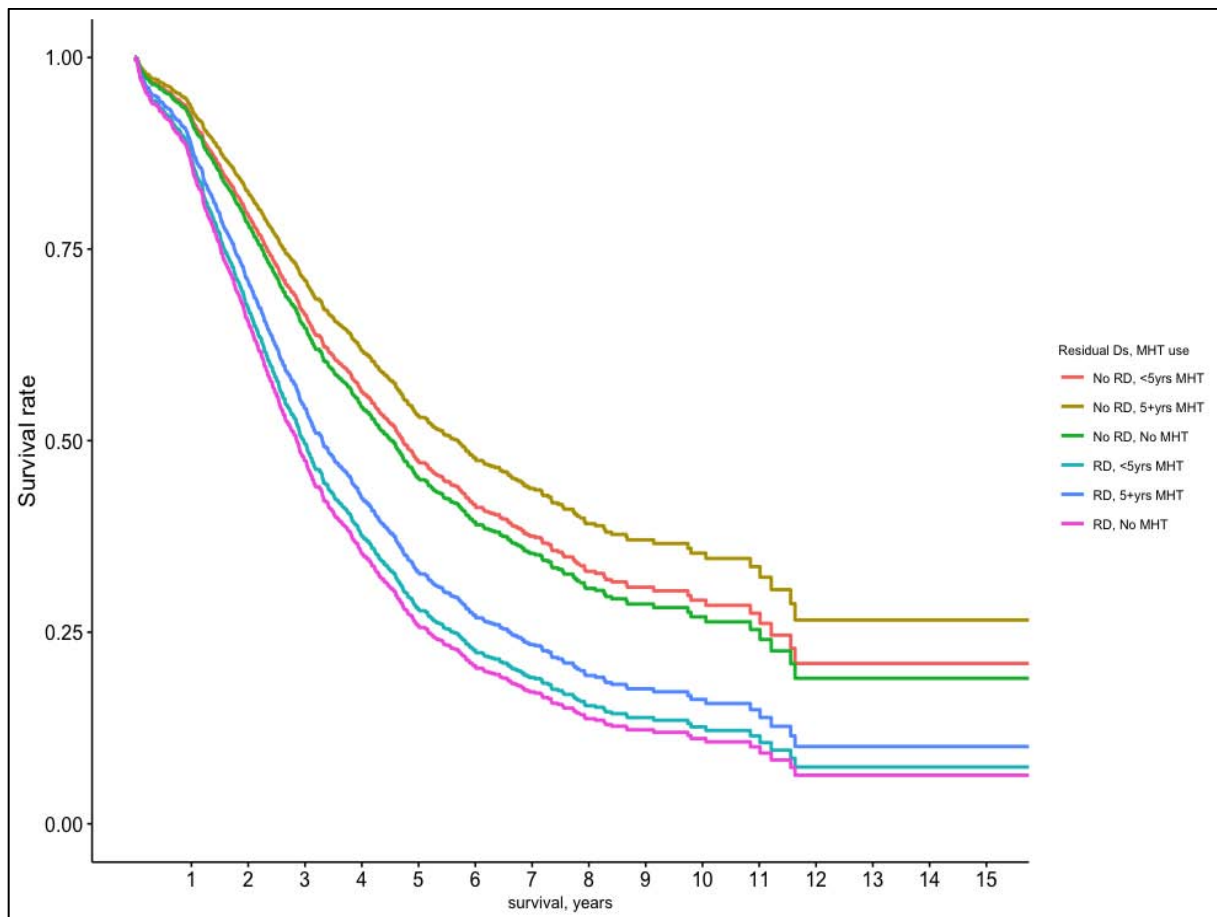

**Figure S2: Adjusted overall survival curves.** Survival curves, among advanced stage, high-grade serous carcinoma. Adjusted for age, race/ethnicity, and OCAC site.
